# Supplementary material for: Impact of Varicocele Repair on Semen Parameters in Infertile Men: A Systematic Review and Meta-Analysis
Source: PubMed Central journal article supplement — World J Mens Health. 2022 Oct 28;41(2):289–310. doi: 10.5534/wjmh.220142 (PMC10042659; doi:10.5534/wjmh.220142), 2022-10-28
Supplement: wjmh-41-289-s001.pdf [file wjmh-41-289-s001.pdf]

**Supplement Table 1.** The PICOS (Population, Intervention, Comparison, Outcome, Study type) model [21] of the current systematic review and meta-analysis

|              | Inclusion                                                                                                                          | Exclusion                                                                                          |
|--------------|------------------------------------------------------------------------------------------------------------------------------------|----------------------------------------------------------------------------------------------------|
| Population   | Infertile men with clinical varicocele                                                                                             | Adolescent, subclinical varicocele, azoospermia                                                    |
| Intervention | Varicocele repair                                                                                                                  | No varicocele repair                                                                               |
| Comparison   | No treatment                                                                                                                       | If any treatment is received in the control                                                        |
| Outcome      | Semen volume<br>Sperm concentration<br>Total sperm count<br>Progressive sperm motility<br>Total sperm motility<br>Sperm morphology | -                                                                                                  |
| Study type   | Randomized controlled studies, case-control studies, cohort studies                                                                | <i>In vitro</i> , animal studies, case reports, editorials, communications, reviews, meta-analyses |
