# Supplementary material for: Impact of Varicocele Repair on Semen Parameters in Infertile Men: A Systematic Review and Meta-Analysis
Source: PubMed Central journal article supplement — World J Mens Health. 2022 Oct 28;41(2):289–310. doi: 10.5534/wjmh.220142 (PMC10042659; doi:10.5534/wjmh.220142), 2022-10-28
Supplement: wjmh-41-289-s002.pdf [file wjmh-41-289-s002.pdf]

Supplementary Table 2. Excluded studies with reasons

| First Author     | Year | Journal                                                        | DOI                                | Exclusion (reason)             |
|------------------|------|----------------------------------------------------------------|------------------------------------|--------------------------------|
| Godart           | 2021 | <i>Translational Andrology and Urology</i>                     | 10.21037/TAU-20-1240               | Not analyzable                 |
| Thakur           | 2020 |                                                                |                                    | Azoospermia                    |
| Yan              | 2020 | <i>Acta Microscopica</i>                                       |                                    | Different topic                |
| Yehya            | 2020 | <i>Annals of Pediatric Surgery</i>                             | 10.1186/s43159-020-00030-2         | Different topic (adolescent)   |
| Tsampoukas       | 2020 | <i>Archivio Italiano di Urologia e Andrologia</i>              | 10.4081/AIUA.2020.4.366            | No varicocele repair           |
| Elbardisi        | 2020 | <i>Andrologia</i>                                              | 10.1111/and.13486                  | Not analyzable                 |
| Tian             | 2020 | <i>Asian Journal of Andrology</i>                              | 10.4103/aja.aja_118_19             | Not analyzable (median)        |
| Jang             | 2020 | <i>Andrologia</i>                                              | 10.1111/and.13809                  | Not analyzable (median)        |
| Salehzadeh       | 2020 | <i>International Urology and Nephrology</i>                    | 10.1007/s11255-020-02566-z         | Not analyzable (median)        |
| Madhusoodanan    | 2020 | <i>Canadian Urological Association Journal</i>                 | 10.5489/cuaj.6047                  | Not analyzable (median)        |
| Lara-Cerrillo    | 2020 | <i>Human Fertility</i>                                         | 10.1080/14647273.2019.1711204      | Not analyzable (median)        |
| Bonnet           | 2020 | <i>Progres en Urologie</i>                                     | 10.1016/j.purol.2020.02.010        | Not analyzable (Median)        |
| Hameed-Ur-Rahman | 2020 | <i>Pakistan Journal of Medical and Health Sciences</i>         |                                    | Not analyzable (median)        |
| Sajadi           | 2019 |                                                                |                                    | Azoospermia                    |
| Balasubramanian  | 2019 | <i>Urology</i>                                                 | 10.1016/j.urolgy.2018.10.021       | No varicocele repair           |
| Khalef           | 2019 | <i>International Journal of Pharmaceutical Research</i>        | 10.31838/ijpr/2019.11.02.021       | Not analyzable                 |
| Hao              | 2019 | <i>Int Urol Nephrol</i>                                        | 10.1007/s11255-019-02226-x         | Not analyzable                 |
| Cavallini        | 2019 | <i>Andrology</i>                                               | 10.1111/andr.12556                 | Not analyzable (median)        |
| Baek             | 2019 | <i>Andrologia</i>                                              | 10.1111/and.13187                  | Not analyzable (median)        |
| AlTaha           | 2019 | <i>Indian Jour I of Public Health Research and Development</i> | 10.37506/VIO/U2/2019/ijphrd/192230 | Not analyzable (median)        |
| D'Andrea         | 2019 | <i>Journal of Endocrinological Investigation</i>               | 10.1007/s40618-019-01042-5         | Not analyzable (Median)        |
| Teixeira         | 2019 | <i>Translational Andrology and Urology</i>                     | 10.21037/tau.2019.06.23            | Not analyzable (no preop data) |
| Yumura           | 2018 | <i>Reproductive Medicine and Biology</i>                       | 10.1002/rmb2.12065                 | Different topic                |
| ur Rehman        | 2018 | <i>Andrologia</i>                                              | 10.1111/and.12856                  | No varicocele repair           |
| Zhi              | 2018 | <i>Asian Journal of Andrology</i>                              | 10.4103/aja.aja_8_18               | Not analyzable                 |
| Perdikakis       | 2018 | <i>Diagnostic and Interventional Imaging</i>                   | 10.1016/j.diii.2018.05.013         | Not analyzable                 |
| Duarsa           | 2018 | <i>Medical Journal of Indonesia</i>                            | 10.13181/mji.v27i4.2636            | Not analyzable (median)        |
| D'Andrea         | 2018 | <i>Andrologia</i>                                              | 10.1111/and.13118                  | Not analyzable (median)        |
| Jangkah          | 2018 | <i>International Journal of Fertility and Sterility</i>        | 10.22074/ijfs.2018.5058            | Not analyzable (median)        |
| McCullough       | 2018 | <i>Asian Journal of Andrology</i>                              | 10.4103/aja.aja-45-17              | Not analyzable (median)        |
| Verhovsky        | 2018 | <i>Urology</i>                                                 | 10.1016/j.urolgy.2018.04.021       | Not analyzable (no preop data) |
| Rehman           | 2018 | <i>BMC Urology</i>                                             | 10.1186/s12894-018-0411-y          | Not analyzable (no preop data) |
| Thirumavalavan   | 2018 | <i>Urology</i>                                                 | 10.1016/j.urolgy.2018.06.036       | Not analyzable (no preop data) |

Supplementary Table 2. Continued 1

| First Author   | Year | Journal                                                | DOI                                | Exclusion (reason)             |
|----------------|------|--------------------------------------------------------|------------------------------------|--------------------------------|
| Pogorelić      | 2017 | <i>J Laparoendosc Adv Surg Tech A</i>                  | 10.1089/lap.2017.0439              | Different topic                |
| De Souza Alves | 2017 | <i>Revista da Associação Médica Brasileira</i>         | 10.1590/1806-9282.63.04.332        | Different topic                |
| Shiraishi      | 2017 | <i>Journal of Urology</i>                              | 10.1016/j.juro.2016.08.085         | Different topic                |
| Francesco      | 2017 | <i>African Journal of Paediatric Surgery</i>           | 10.4103/ajps.AJPS_58_16            | Different topic (adolescent)   |
| Chen           | 2017 | <i>Zhonghua Nan Ke Xue</i>                             | 10.13181/mji.v26i4.1623            | No varicocele repair           |
| Chen           | 2017 | <i>Zhongguo Zhong Xi Yi Jie He Za Zhi</i>              | 10.1111/and.12620                  | No varicocele repair           |
| Ariyati        | 2017 | <i>Medical Journal of Indonesia</i>                    | 10.1016/j.urol.2016.12.037         | No varicocele repair           |
| Kimura         | 2017 | <i>Andrologia</i>                                      | 10.1111/and.12620                  | Not analyzable                 |
| Wu             | 2017 | <i>Urology</i>                                         | 10.1016/j.urol.2017.04.026         | Not analyzable                 |
| Abdelwahab     | 2017 | <i>Urology</i>                                         | 10.1016/j.urol.2017.01.006         | Not analyzable                 |
| Bilreiro       | 2017 | <i>Diagnostic and Interventional Imaging</i>           | 10.1016/j.diii.2017.01.006         | Not analyzable                 |
| Bo             | 2017 | <i>Australasian Medical Journal</i>                    | 10.21767/AMJ.2017.3117             | Not analyzable (median)        |
| D'Andrea       | 2017 | <i>Journal of Endocrinological Investigation</i>       | 10.1007/s40618-017-0695-x          | Not analyzable (median)        |
| Shahjehan      | 2017 | <i>Pakistan Journal of Medical and Health Sciences</i> | 10.1016/jejro.2017.09.001          | Not analyzable (no preop data) |
| Basile         | 2017 | <i>European Journal of Radiology Open</i>              | 10.1007/s11255-017-1564-4          | Not analyzable (no preop data) |
| Zhang          | 2017 | <i>International Urology and Nephrology</i>            | 10.1007/s40618-015-0401-9          | Not analyzable (RR data)       |
| Condorelli     | 2016 | <i>Journal of Endocrinological Investigation</i>       | 10.1007/s40618-015-0401-9          | Not analyzable                 |
| Najari         | 2016 | <i>Urology</i>                                         | 10.1016/j.urol.2015.11.033         | Not analyzable                 |
| Crestani       | 2016 | <i>Asian Journal of Andrology</i>                      | 10.4103/1008-682X.171658           | Not analyzable                 |
| Majzoub        | 2016 | <i>Andrology</i>                                       | 10.1111/andr.12226                 | Not analyzable (median)        |
| Altintas       | 2016 | <i>Andrology</i>                                       | 10.1111/andr.12172                 | Not analyzable (median)        |
| Goren          | 2016 | <i>Urology</i>                                         | 10.1016/j.urol.2015.11.032         | Not analyzable (median)        |
| Jeje           | 2016 | <i>African Journal of Urology</i>                      | 10.1016/j.afju.2015.10.003         | Not analyzable (no preop data) |
| Saadatmand     | 2016 |                                                        |                                    | Review                         |
| Zhang          | 2015 | <i>Urology</i>                                         | 10.1016/j.urol.2014.12.043         | Case report                    |
| Behzad         | 2015 | <i>Tehran University Medical Journal</i>               |                                    | Different topic                |
| Cyrus          | 2015 | <i>International Braz J Urol</i>                       | 10.1590/S1677-5538.IBJU.2015.02.07 | Different topic                |
| Alshehri       | 2015 | <i>Saudi Medical Journal</i>                           | 10.15537/smj.2015.12.12755         | Different topic                |
| Ustuner        | 2015 | <i>BioMed Research International</i>                   | 10.1155/2015/709452                | Different topic                |
| D'Andrea       | 2015 | <i>Journal of Endocrinological Investigation</i>       | 10.1007/s40618-015-0259-x          | Not analyzable                 |
| Gorur          | 2015 | <i>Andrologia</i>                                      | 10.1111/and.12287                  | Not analyzable                 |
| Ali            | 2015 | <i>European Radiology</i>                              | 10.1007/s00330-015-3684-5          | Not analyzable                 |
| Cavallini      | 2015 | <i>Urology Annals</i>                                  | 10.4103/0974-7796.148625           | Not analyzable                 |

Supplementary Table 2. Continued 2

| First Author       | Year | Journal                                                   | DOI                              | Exclusion (reason)             |
|--------------------|------|-----------------------------------------------------------|----------------------------------|--------------------------------|
| Diallo             | 2015 | <i>African Journal of Urology</i>                         | 10.1016/j.afju.2015.02.002       | Not analyzable (% improvement) |
| Ollandini          | 2014 | <i>Andrology</i>                                          | 10.1111/j.2047-2927.2014.00197.x | Not analyzable                 |
| Dawoud             | 2014 | <i>Egyptian Journal of Radiology and Nuclear Medicine</i> | 10.1016/j.ejrm.2013.12.013       | Not analyzable                 |
| Asadpour           | 2014 | <i>Nephro-Urology Monthly</i>                             | 10.5812/numonthly.15991          | Not analyzable                 |
| Ni                 | 2014 | <i>Journal of Urology</i>                                 | 10.1016/j.juro.2014.02.046       | Not analyzable                 |
| García-Peiró       | 2014 | <i>BioMed Research International</i>                      | 10.1155/2014/181396              | Not analyzable                 |
| Nematollahi-Mahani | 2014 | <i>Andrologia</i>                                         | 10.1111/and.12067                | Not analyzable                 |
| Shibata            | 2014 | <i>Kitakanto Medical Journal</i>                          | 10.2974/kmj.64.31                | Not analyzable (% improvement) |
| Huang              | 2014 | <i>Reproduction. Fertility and Development</i>            | 10.1071/RD12368                  | Not analyzable (% improvement) |
| Zampieri           | 2013 |                                                           |                                  | Azoospermia                    |
| Kıraç              | 2013 |                                                           |                                  | Azoospermia                    |
| Gokce              | 2013 | <i>Andrology</i>                                          | 10.1111/j.2047-2927.2012.00014.x | Different topic                |
| El-Shazly          | 2013 | <i>Urologia Internationalis</i>                           | 10.1159/000350860                | Not analyzable                 |
| Krupin             | 2013 | <i>Sovremennye Tehnologii v Medicine</i>                  |                                  | Not analyzable                 |
| Azizollahi         | 2013 | <i>Journal of assisted reproduction and genetics</i>      | 10.1007/s10815-013-9961-9        | Not analyzable                 |
| Friedersdorff      | 2013 | <i>Surgical Endoscopy</i>                                 | 10.1007/s00464-013-2938-z        | Not analyzable (% improvement) |
| Kıraç              | 2013 | <i>Türk Uroloji Dergisi</i>                               | 10.5152/tud.2013.006             | Not analyzable (median)        |
| Abdel-Meguid       | 2012 |                                                           |                                  | Azoospermia                    |
| Fariello           | 2012 | <i>Hum Reprod</i>                                         | 10.1093/humrep/des287            | Different topic                |
| Chen               | 2012 | <i>Urology</i>                                            | 10.1016/j.urology.2011.08.063    | Different topic                |
| Söylemez           | 2012 | <i>Int Urol Nephrol</i>                                   | 10.1007/s11255-011-0038-3        | Different topic                |
| Campos Hernández   | 2012 | <i>Revista Internacional de Andrologia</i>                | 10.1016/S1698-031X(12)70060-2    | Different topic                |
| Amirzargar         | 2012 | <i>Iranian Journal of Reproductive Medicine</i>           |                                  | Different topic                |
| Ghazimoghaddam     | 2012 | <i>HealthMED</i>                                          |                                  | Different topic                |
| Laghari            | 2012 | <i>Medical Channel</i>                                    |                                  | Different topic (adolescent)   |
| Shiraiishi         | 2012 | <i>Nishinon Journal of Urology</i>                        |                                  | Different topic (TESE)         |
| Pasqualotto        | 2012 | <i>Journal of Andrology</i>                               | 10.2164/jandrol.110.011932       | Not analyzable                 |
| Eisenberg          | 2012 | <i>BJU International</i>                                  | 10.1111/j.1464-410X.2012.11154.x | Not analyzable                 |
| Barry              | 2012 | <i>African Journal of Urology</i>                         | 10.1016/j.afju.2012.04.004       | Not analyzable                 |
| Ughi               | 2012 | <i>Archivio Italiano di Urologia e Andrologia</i>         |                                  | Not analyzable                 |
| Almaramby          | 2012 | <i>African Journal of Urology</i>                         | 10.1016/j.afju.2012.09.004       | Not analyzable                 |
| Pham               | 2012 | <i>Journal of Urology</i>                                 | 10.1016/j.juro.2011.09.033       | Not analyzable                 |
| Diao               | 2012 | <i>Andrologie</i>                                         | 10.1007/s12610-012-0157-9        | Not analyzable (Median)        |

Supplementary Table 2. Continued 3

| First Author | Year | Journal                                                           | DOI                              | Exclusion (reason)             |
|--------------|------|-------------------------------------------------------------------|----------------------------------|--------------------------------|
| Chen         | 2012 | <i>Urology</i>                                                    | 10.1016/j.urology.2012.05.014    | Not analyzable (no preop data) |
| Park         | 2011 |                                                                   |                                  | Not analyzable (Median)        |
| Rossitto     | 2011 |                                                                   | 1                                | Not analyzable (no sd)         |
| Chen         | 2011 | <i>Scientific Research and Essays</i>                             | 10.5897/SRE11.357                | Different topic                |
| Zohdy        | 2011 | <i>Journal of Sexual Medicine</i>                                 | 10.1111/j.1743-6109.2010.01974.x | Not analyzable (median)        |
| Weidner      | 2011 | <i>Aktuelle Urologie</i>                                          | 10.1055/s-0031-1283705           | Review                         |
| Liguori      | 2010 |                                                                   | 1                                | Not analyzable (no sd)         |
| Rabbani      | 2010 | <i>Pakistan Journal of Medical and Health Sciences</i>            |                                  | Different topic                |
| Sangrasi     | 2010 | <i>Journal of the College of Physicians and Surgeons Pakistan</i> |                                  | Different topic (adolescent)   |
| Fang         | 2010 | <i>Phytomedicine</i>                                              | 10.1016/j.phymed.2009.07.014     | Not analyzable                 |
| Lee          | 2010 | 1                                                                 | 3                                | Not analyzable (median)        |
| Gat          | 2010 | <i>Andrologia</i>                                                 | 10.1111/j.1439-0272.2010.01047.x | Not analyzable (median)        |
| Cocuzza      | 2009 |                                                                   |                                  | Not analyzable (no sd)         |
| Liguori      | 2009 |                                                                   | 1                                | Not analyzable (no sd)         |
| Agarwal      | 2009 |                                                                   | 1                                | Not analyzable (no sd)         |
| Youssef      | 2009 |                                                                   |                                  | Azoospermia                    |
| Inci         | 2009 | <i>J Urol</i>                                                     | 10.1016/j.juro.2009.06.028       | Not analyzable                 |
| Choi         | 2009 | <i>Korean Journal of Urology</i>                                  | 10.4111/kju.2009.50.1.39         | Not analyzable (% improvement) |
| Jallouli     | 2008 |                                                                   |                                  | Azoospermia                    |
| Ishikawa     | 2008 |                                                                   |                                  | Azoospermia                    |
| Cardia       | 2008 | <i>Chirurgia</i>                                                  |                                  | Different topic (adolescent)   |
| Sakamoto     | 2008 | <i>BJU International</i>                                          | 10.1111/j.1464-410X.2008.07517.x | No varicocele repair           |
| Lee          | 2007 |                                                                   |                                  | Azoospermia                    |
| Mottrie      | 2007 | <i>Aktuelle Urol</i>                                              | 10.1055/s-2005-873218            | Not analyzable                 |
| Schiff       | 2006 |                                                                   | 1                                | Not analyzable (median)        |
| Pasqualotto  | 2006 |                                                                   |                                  | Azoospermia                    |
| Al-Hunayan   | 2006 | <i>Urology</i>                                                    | 10.1016/j.urology.2005.09.049    | Different topic                |
| Chen         | 2006 | <i>International Surgery</i>                                      |                                  | Not analyzable                 |
| Fuse         | 2006 | <i>Archives of Andrology</i>                                      | 10.1080/01485010500428397        | Not analyzable                 |
| Schwarzer    | 2006 | <i>Journal fur Urologie und Urogynakologie</i>                    |                                  | Not analyzable                 |

Supplementary Table 2. Continued 4

| First Author | Year | Journal                               | DOI                                | Exclusion (reason)             |
|--------------|------|---------------------------------------|------------------------------------|--------------------------------|
| Mostafa      | 2006 | Asian Journal of Andrology            | 10.1111/j.1745-7262.2006.00172.x   | Not analyzable (no preop data) |
| Kiuchi       | 2005 |                                       | 1                                  | Not analyzable (Median)        |
| Ammaturo     | 2005 |                                       | 1                                  | Not analyzable (%)             |
| Gat          | 2005 |                                       |                                    | Azoospermia                    |
| Esteves      | 2005 |                                       |                                    | Azoospermia                    |
| Kiliç        | 2005 | <i>Urol Int</i>                       | 10.1159/000083290                  | Different topic                |
| Kiliç        | 2005 | <i>Türk Uroloji Dergisi</i>           |                                    | Different topic (ART)          |
| Okubo        | 2005 | <i>Fertility and Sterility</i>        | 10.1016/j.fertnstert.2004.11.057   | Not analyzable                 |
| Marmar       | 2005 | <i>Hum Reprod</i>                     | 10.1093/humrep/dei027              | Not analyzable                 |
| Tunç         | 2005 | <i>Archives of Andrology</i>          | 10.1080/014850190884318            | Not analyzable                 |
| Zucchi       | 2005 | <i>Journal of Andrology</i>           | 10.2164/jandrol.04143              | Not analyzable (median)        |
| Villar Esnal | 2004 | <i>Arch Esp Urol</i>                  |                                    | Different topic                |
| Cavallini    | 2004 | <i>Journal of Andrology</i>           | 10.1002/j.1939-4640.2004.tb02853.x | No varicocele repair           |
| Casamayor    | 2004 | <i>Archivos Espanoles de Urologia</i> |                                    | Not analyzable (% improvement) |
| Casamayor    | 2004 | <i>Archivos Espanoles de Urologia</i> |                                    | Not analyzable (% improvement) |
| Esnal        | 2004 | <i>Archivos Espanoles de Urologia</i> |                                    | Not analyzable (% improvement) |
| Tanahatoo    | 2004 | <i>Fertility and Sterility</i>        | 10.1016/j.fertnstert.2003.10.044   | Not analyzable (median)        |
| Pasqualotto  | 2003 | <i>Human Reproduction</i>             | 10.1093/humrep/deg032              | Case report                    |
| Fujisawa     | 2003 | <i>J Urol</i>                         | 10.1097/01.ju.0000095326.78152.a2  | Different topic                |
| Trombetta    | 2003 | <i>Urologia Internationalis</i>       | 10.1159/000068184                  | Not analyzable                 |
| Shiraishi    | 2003 | <i>Archives of Andrology</i>          | 10.1080/01485010390236396          | Not analyzable                 |
| Kumar        | 2003 | <i>Urologia Internationalis</i>       | 10.1159/000074087                  | Not analyzable (median)        |
| Sautter      | 2002 | <i>European Urology</i>               | 10.1016/S0302-2838(02)00022-2      | Different topic                |
| Kbaier       | 2002 | <i>Annales d'Urologie</i>             | 10.1016/S0003-4401(02)00125-0      | Not analyzable                 |
| Ajina        | 2002 | <i>Andrologie</i>                     | 10.1007/bf03034964                 | Not analyzable (no preop data) |
| Chen         | 2001 | <i>Free Radic Biol Med</i>            | 10.1016/s0891-5849(01)00536-6      | Different topic                |
| Shiraishi    | 2001 | <i>Andrologia</i>                     | 10.1046/j.1439-0272.2001.00452.x   | Not analyzable                 |
| Perimenis    | 2001 | <i>European Urology</i>               | 10.1159/000052461                  | Not analyzable (median)        |
| Daitch       | 2001 | <i>Journal of Urology</i>             | 10.1016/s0022-5347(05)66338-0      | Not analyzable (no preop data) |
| Pasqualotto  | 2000 | <i>Fertility and Sterility</i>        | 10.1016/S0015-0282(99)00567-1      | No varicocele repair           |
| Kadioglu     | 1999 | <i>BJU International</i>              | 10.1046/j.1464-410X.1999.00976.x   | Biais                          |
| Armellino    | 1999 | <i>Minerva Chirurgica</i>             |                                    | Different topic (adolescent)   |
| Gueye        | 1999 | <i>Andrologie</i>                     | 10.1007/BF03034810                 | Not analyzable                 |

Supplementary Table 2. Continued 5

| First Author  | Year | Journal                                                                                           | DOI                                   | Exclusion (reason)           |
|---------------|------|---------------------------------------------------------------------------------------------------|---------------------------------------|------------------------------|
| Belgrano      | 1999 | <i>Annales d'Urologie</i>                                                                         |                                       | Not analyzable (median)      |
| Stern R       | 1998 | <i>Pediatr Surg Int</i>                                                                           | 10.1007/s003830050440                 | Different topic              |
| Zarrilli      | 1998 | <i>Chirurgia italiana</i>                                                                         |                                       | Different topic (adolescent) |
| Carbone       | 1998 | <i>Journal of Urology</i>                                                                         | 10.1016/S0022-5347(01)63744-3         | No varicocele repair         |
| Schlegel      | 1997 | <i>Urology</i>                                                                                    | 10.1016/S0090-4295(96)00379-2         | Different topic              |
| Kakinada      | 1997 | <i>British Journal of Urology</i>                                                                 |                                       | No varicocele repair         |
| Spaziani      | 1997 | <i>Surgical Laparoscopy, Endoscopy and Percutaneous Techniques</i>                                | 10.1097/00019509-199704000-00015      | Not analyzable               |
| Segenreich    | 1997 | <i>British Journal of Urology</i>                                                                 |                                       | Not analyzable (median)      |
| Feneley       | 1997 | <i>British Journal of Urology</i>                                                                 | 10.1046/j.1464-410x.1997.00407.x      | Not analyzable (median)      |
| Prenen        | 1996 | <i>Clinical Nuclear Medicine</i>                                                                  | 10.1097/00003072-199612000-00001      | No varicocele repair         |
| Burke         | 1996 | <i>Radiologia Medica</i>                                                                          |                                       | Not analyzable               |
| Bassi         | 1996 | <i>Minerva Chirurgica</i>                                                                         |                                       | Not analyzable               |
| Yamamoto      | 1995 | <i>Systems Biology in Reproductive Medicine</i>                                                   | 10.3109/01485019508987853             | Biais                        |
| Sabanegh      | 1995 | <i>Fertility and Sterility</i>                                                                    | 10.1016/S0015-0282(16)57374-9         | Case report                  |
| Risse         | 1995 | <i>RoFo Fortschritte auf dem Gebiete der Rontgenstrahlen und der Neuen Bildgebenden Verfahren</i> |                                       | Case report                  |
| Grasso        | 1995 | <i>The Journal of Urology</i>                                                                     | 10.1016/S0022-5347(01)67327-0         | Different topic (adolescent) |
| Musella       | 1995 | <i>Annali italiani di chirurgia</i>                                                               |                                       | Not analyzable               |
| Comhaire      | 1995 | <i>Andrologia</i>                                                                                 | 10.1111/j.1439-0272.1995.tb01096.x    | Not analyzable               |
| Fuse          | 1995 | <i>Systems Biology in Reproductive Medicine</i>                                                   | 10.3109/01485019508987865             | Not analyzable               |
| Baccetti      | 1995 | <i>Journal of Andrology</i>                                                                       | 10.1002/j.1939-4640.1995.tb00541.x    | Not analyzable (median)      |
| Haidl         | 1994 | <i>Acta chirurgica Hungarica</i>                                                                  |                                       | Not analyzable (median)      |
| Witt MA       | 1993 | <i>Urology</i>                                                                                    | 10.1016/0090-4295(93)90268-f          | Commentary                   |
| Breznik       | 1993 | <i>Systems Biology in Reproductive Medicine</i>                                                   | 10.3109/01485019308987750             | Duplication                  |
| Cvitanic      | 1993 | <i>Radiology</i>                                                                                  | 10.1148/radiology.187.3.8497618       | Not analyzable               |
| Schieferstein | 1993 | <i>H+G Zeitschrift für Hautkrankheiten</i>                                                        |                                       | Not analyzable               |
| Lund          | 1992 | <i>Ugeskrift for laeger</i>                                                                       |                                       | Not analyzable               |
| Fuse          | 1991 | <i>Arch Androl</i>                                                                                |                                       | Different topic              |
| Mogami        | 1991 | <i>Nippon Igaku Hoshasen Gakkai zasshi. Nippon acta radiologica</i>                               | 10.3109/01485019108987665             | Not analyzable               |
| Kazama        | 1991 | <i>Hinyokika kiyo. Acta urologica Japonica</i>                                                    |                                       | Not analyzable               |
| Silber        | 1989 | <i>Human Reproduction</i>                                                                         | 10.1093/oxfordjournals.humrep.a136896 | Different topic              |
| Hosli         | 1989 | <i>Helvetica Chirurgica Acta</i>                                                                  |                                       | Different topic (adolescent) |

Supplementary Table 2. Continued 6

| First Author    | Year | Journal                                                                       | DOI                                | Exclusion (reason)     |
|-----------------|------|-------------------------------------------------------------------------------|------------------------------------|------------------------|
| Sachot          | 1989 | <i>Revue Francaise de Gynecologie et d'Obstetrique</i>                        |                                    | Review                 |
| Kuku            | 1989 | <i>Systems Biology in Reproductive Medicine</i>                               | 10.3109/01485018908986778          | Review                 |
| Talati          | 1988 | <i>British Journal of Urology</i>                                             | 10.1111/j.1464-410X.1988.tb13974.x | Different topic        |
| Gerris          | 1988 | <i>European Journal of Obstetrics and Gynecology and Reproductive Biology</i> | 10.1016/S0028-2243(88)80009-1      | Duplication            |
| Bsat            | 1988 | <i>Fertil Steril</i>                                                          | 10.1016/s0015-0282(16)60080-8      | Not analyzable         |
| Shinoda         | 1988 | <i>Acta Urologica Japonica</i>                                                |                                    | Not analyzable         |
| Terada          | 1988 | 1                                                                             | 1                                  | Not analyzable         |
| Okuyama         | 1988 | <i>European Urology</i>                                                       | 10.1159/000473005                  | Not analyzable         |
| Dubin           | 1988 | <i>Int J Fertil</i>                                                           |                                    | Review                 |
| Halden          | 1987 | <i>Urol Clin North Am</i>                                                     |                                    | Book chapter           |
| Amelar          | 1987 | <i>Urology</i>                                                                | 10.1016/0090-4295(87)90573-5       | Not analyzable         |
| Lynch           | 1986 | <i>Fertility and Sterility</i>                                                | 10.1016/S0015-0282(16)49589-0      | Not analyzable         |
| Marks           | 1986 | <i>Journal of Urology</i>                                                     | 10.1016/S0022-5347(17)44990-1      | Not analyzable         |
| Kunnen          | 1986 | <i>Annales de Radiologie</i>                                                  |                                    | Not analyzable         |
| Eppel           | 1985 |                                                                               |                                    | Not analyzable (no sd) |
| Hardy           | 1985 | <i>Acta urologica Belgica</i>                                                 |                                    | No varicocele repair   |
| Rogers          | 1985 | <i>Fertility and Sterility</i>                                                | 10.1016/S0015-0282(16)49041-2      | Not analyzable         |
| Comhaire        | 1985 | <i>Tijdschrift voor Geneeskunde</i>                                           |                                    | Not analyzable         |
| Belgrano        | 1984 | <i>Eur Urol</i>                                                               | 10.1159/000463769                  | not analyzable         |
| Bach            | 1984 | <i>Urologe A</i>                                                              |                                    | Not analyzable         |
| Papp            | 1983 |                                                                               |                                    | Not analyzable (no sd) |
| Gerber          | 1983 | <i>J Urol</i>                                                                 | 10.1016/s0022-5347(17)51100-3      | Different topic        |
| Ibrahim         | 1983 | <i>Andrologia</i>                                                             | 10.1111/j.1439-0272.1983.tb00205.x | Different topic        |
| Mićić           | 1983 | <i>Urol Int</i>                                                               | 10.1159/000280888                  | Different topic        |
| Hudson          | 1983 | <i>International Journal of Andrology</i>                                     | 10.1111/j.1365-2605.1983.tb00332.x | Not analyzable         |
| Comhaire        | 1983 | <i>Journal of Urology</i>                                                     | 10.1016/S0022-5347(17)51578-5      | Not analyzable         |
| Takasaki        | 1983 | <i>Acta Urologica Japonica</i>                                                |                                    | Not analyzable         |
| Glowania        | 1983 | <i>Therapiewoche</i>                                                          |                                    | Not analyzable         |
| Lecomte         | 1983 | <i>Journal de Gynecologie Obstetrique et Biologie de la Reproduction</i>      |                                    | Not analyzable         |
| Rodriguez-Rigau | 1982 | <i>Fertility and Sterility</i>                                                | 10.1016/S0015-0282(16)46408-3      | Different topic        |
| Yoshida         | 1982 | <i>Fertil Steril</i>                                                          | 10.1016/s0015-0282(16)46699-9      | Different topic        |
| Smith           | 1982 | <i>Clin Obstet Gynecol</i>                                                    | 10.1097/00003081-198209000-00005   | Different topic        |

Supplementary Table 2. Continued 7

| First Author  | Year | Journal                                                                  | DOI                                | Exclusion (reason)           |
|---------------|------|--------------------------------------------------------------------------|------------------------------------|------------------------------|
| Zorgniotti    | 1982 | <i>Urology</i>                                                           | 10.1016/0090-4295(82)90018-8       | Different topic              |
| Pujol         | 1982 | <i>Br J Urol</i>                                                         | 10.1111/j.1464-410x.1982.tb06982.x | Different topic              |
| Narayan       | 1981 |                                                                          |                                    | Not analyzable (no sd)       |
| Maar          | 1981 |                                                                          |                                    | Not analyzable (no sd)       |
| Schramek      | 1981 | <i>Urologe - Ausgabe A</i>                                               |                                    | Not analyzable               |
| Togawa        | 1981 | <i>Nishinon Journal of Urology</i>                                       |                                    | Not analyzable               |
| Bhanot        | 1980 |                                                                          |                                    | Not analyzable (no sd)       |
| Dubin         | 1980 | <i>Fertil Steril</i>                                                     | 10.1016/s0015-0282(16)44847-8      | Letter                       |
| Lewis         | 1980 | <i>Fertility and Sterility</i>                                           | 10.1016/s0015-0282(16)44959-9      | Not analyzable               |
| Villani       | 1980 | <i>Urologia</i>                                                          | 10.1177/039156038004700510         | Not analyzable               |
| Pontonnier    | 1979 | <i>Journal de Gynecologie Obstetrique et Biologie de la Reproduction</i> |                                    | Different topic              |
| Klosterhalfen | 1979 | <i>Urologe - Ausgabe A</i>                                               |                                    | Different topic (adolescent) |
| Abate         | 1979 | <i>Urologia</i>                                                          | 10.1177/039156037904600602         | Not analyzable               |
| Greenberg     | 1978 | <i>Journal of Urology</i>                                                | 10.1016/S0022-5347(17)57531-X      | Different topic              |
| Frang         | 1978 | <i>International Urology and Nephrology</i>                              | 10.1007/BF02082133                 | not analyzable               |
| Hill          | 1977 | <i>British Journal of Surgery</i>                                        | 10.1002/bjs.1800641017             | Different topic              |
| Smith         | 1977 | <i>Fertil Steril</i>                                                     | 10.1016/s0015-0282(16)42976-6      | Not analyzable               |
| Freiha        | 1976 |                                                                          |                                    | Not analyzable (no sd)       |
| Fogh-Andersen | 1976 | <i>Obstetrical and Gynecological Survey</i>                              | 10.1097/00006254-197601000-00022   | Different topic              |
| Comhaire      | 1975 | <i>Journal of Clinical Endocrinology and Metabolism</i>                  | 10.1210/jcem-40-5-824              | Different topic              |
| Dubin         | 1975 | <i>Journal of Urology</i>                                                | 10.1016/S0022-5347(17)59542-7      | Duplication                  |
| Rost          | 1975 | <i>Urologe - Ausgabe A</i>                                               |                                    | Not analyzable               |
| Mobley        | 1974 | <i>Urology</i>                                                           | 10.1016/S0090-4295(74)80164-0      | Different topic              |
| Homonnai      | 1974 | <i>Harefuah</i>                                                          |                                    | Not analyzable               |
| Stewart       | 1973 | <i>Journal of Urology</i>                                                | 10.1016/S0022-5347(17)60166-6      | Duplication                  |
| Scott         | 1969 |                                                                          |                                    | Not analyzable (no sd)       |
| Afflerbach    | 1968 | <i>Deutsche Medizinische Wochenschrift</i>                               | 10.1055/s-0028-1110955             | Case report                  |
| Von Haensch   | 1968 | <i>Dermatology</i>                                                       | 10.1159/000254119                  | Different topic              |
| Klosterhalfen | 1964 | <i>Deutsche Medizinische Wochenschrift</i>                               | 10.1055/s-0028-1113266             | Not analyzable               |
